# Supplementary material for: FKBP5 polymorphisms induce differential glucocorticoid responsiveness in primary CNS cells – First insights from novel humanized mice
Source: PubMed Central journal article supplement (PMC7894319; doi:10.1111/ejn.14999), 2020-10-27

# Fkbp5

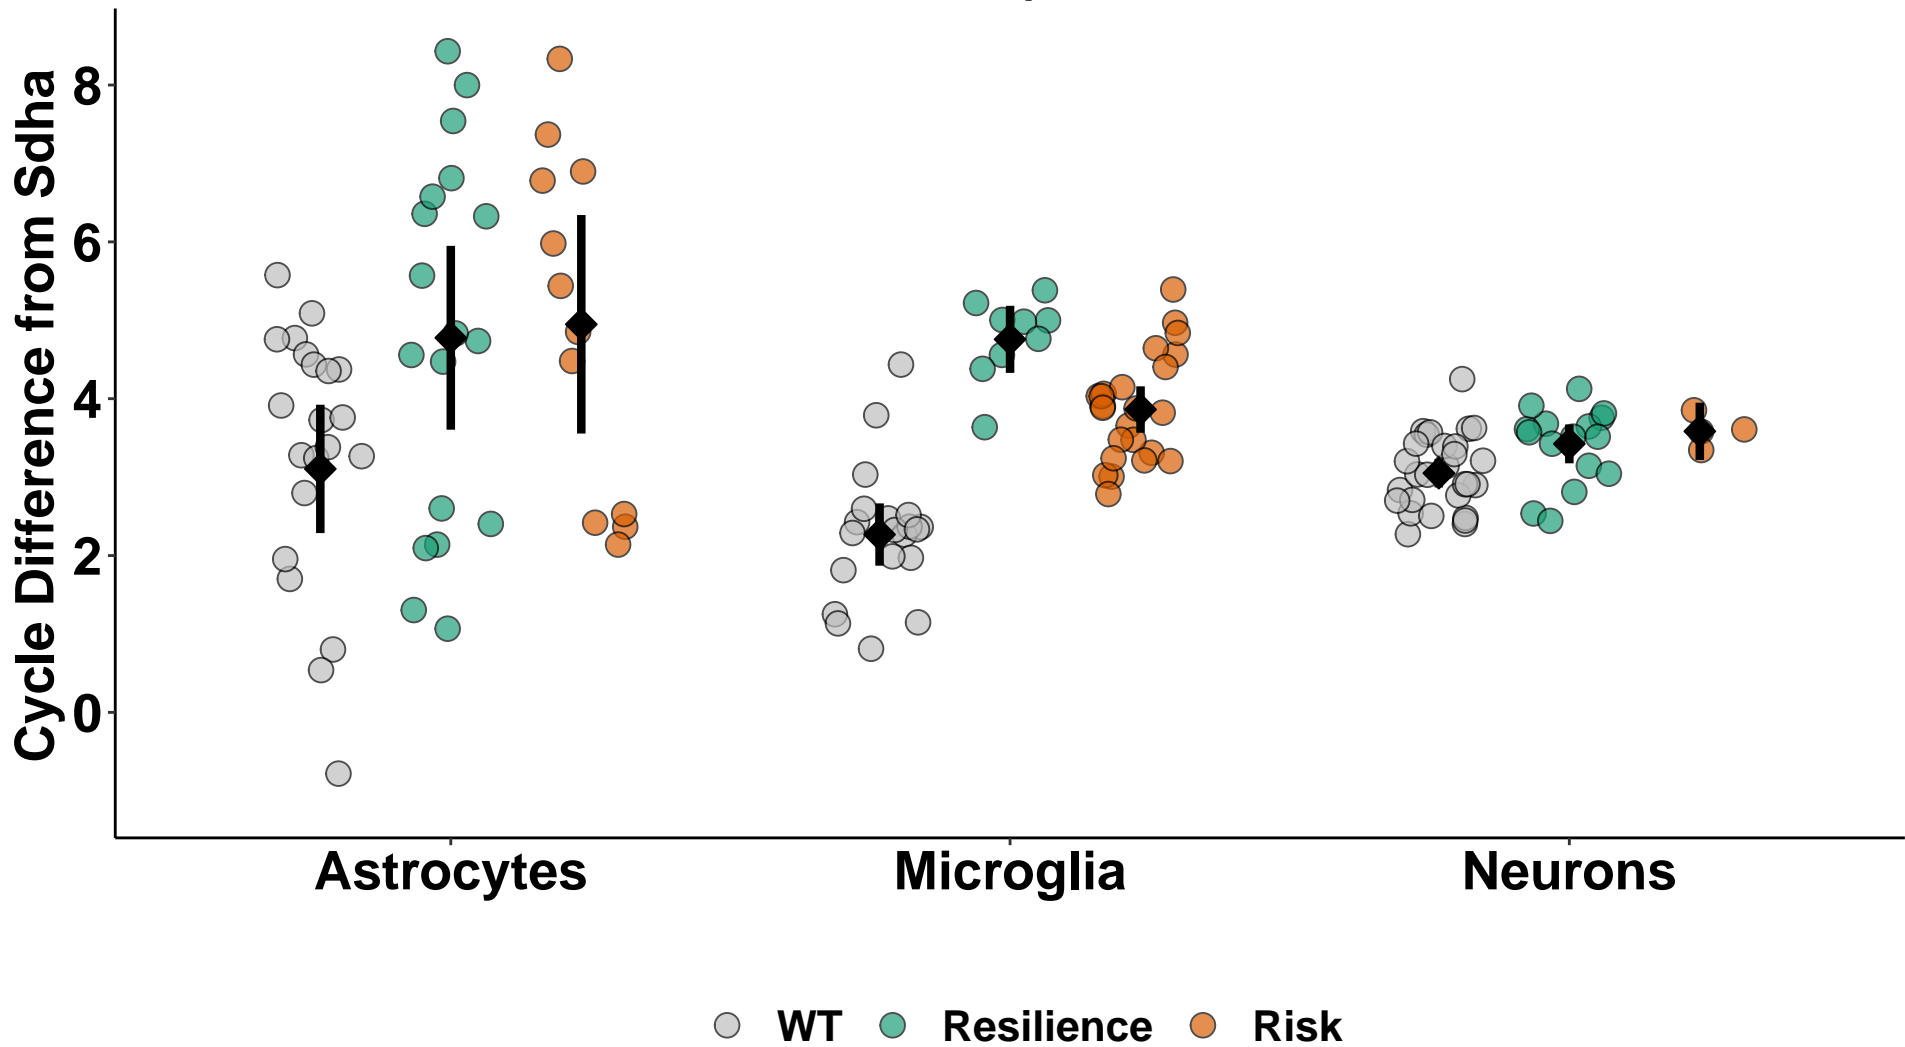

Supplement: EJN-53-402-s003.pdf [file EJN-53-402-s003.pdf]
