# Supplementary material for: FKBP5 polymorphisms induce differential glucocorticoid responsiveness in primary CNS cells – First insights from novel humanized mice
Source: PubMed Central journal article supplement (PMC7894319; doi:10.1111/ejn.14999), 2020-10-27

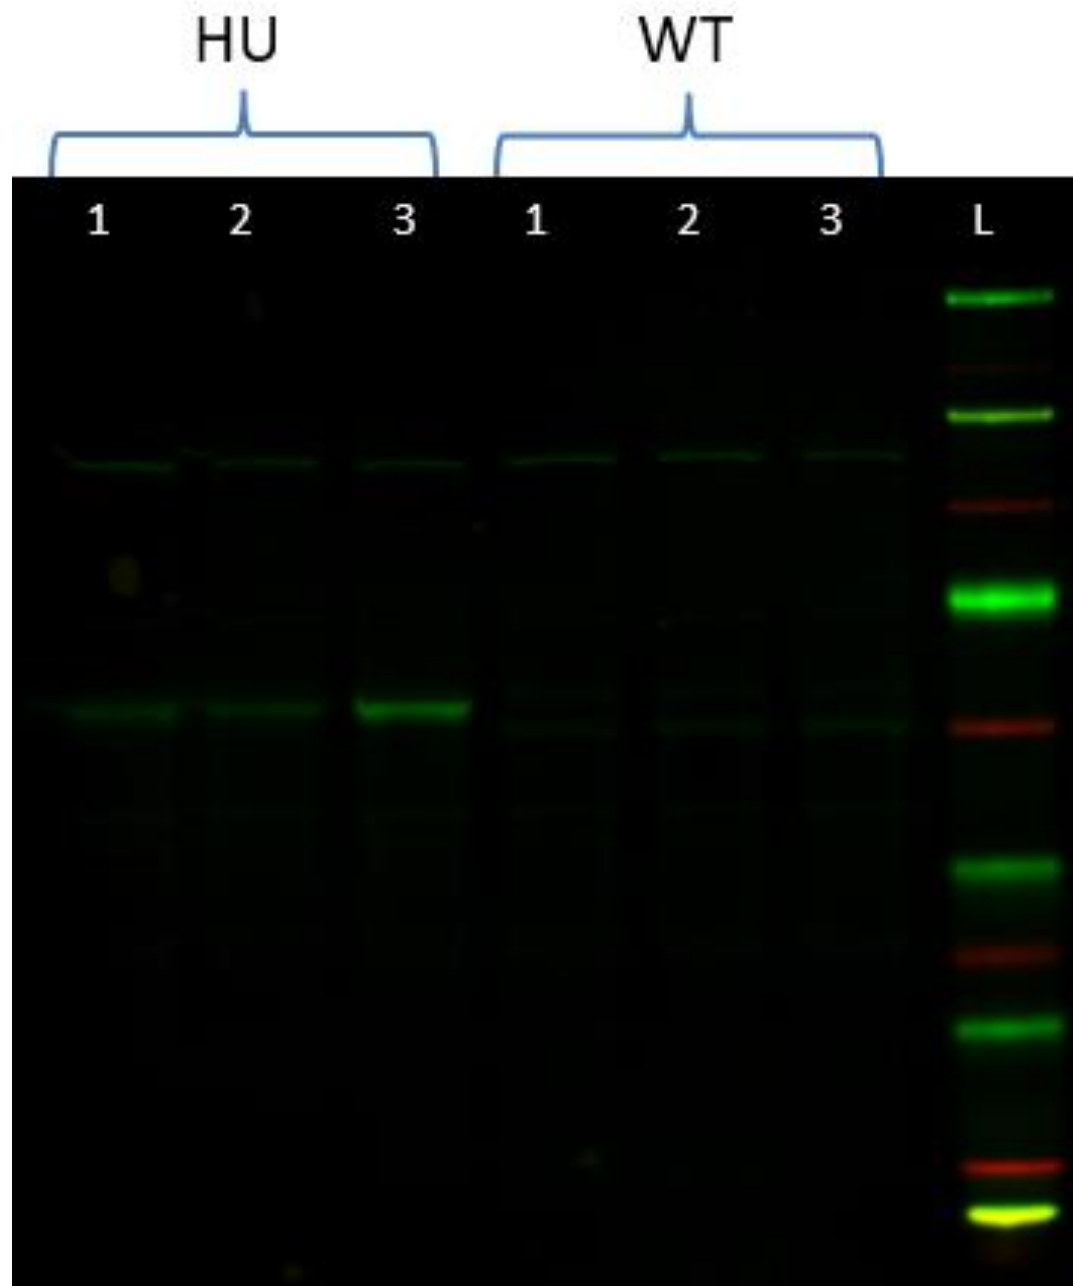

HU

WT

1

2

3

1

2

3

L

L Chameleon Duo

1 PFC

2 Amygdala

3 Hippocampus

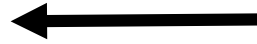

Supplement: EJN-53-402-s004.pdf [file EJN-53-402-s004.pdf]
